# Supplementary material
Source: PubMed Central journal article supplement (PMC3324175)

**A**

|              |   |   |   |   |
|--------------|---|---|---|---|
| <b>UUO</b>   | - | + | + | - |
| <b>4-PBA</b> | - | - | + | + |

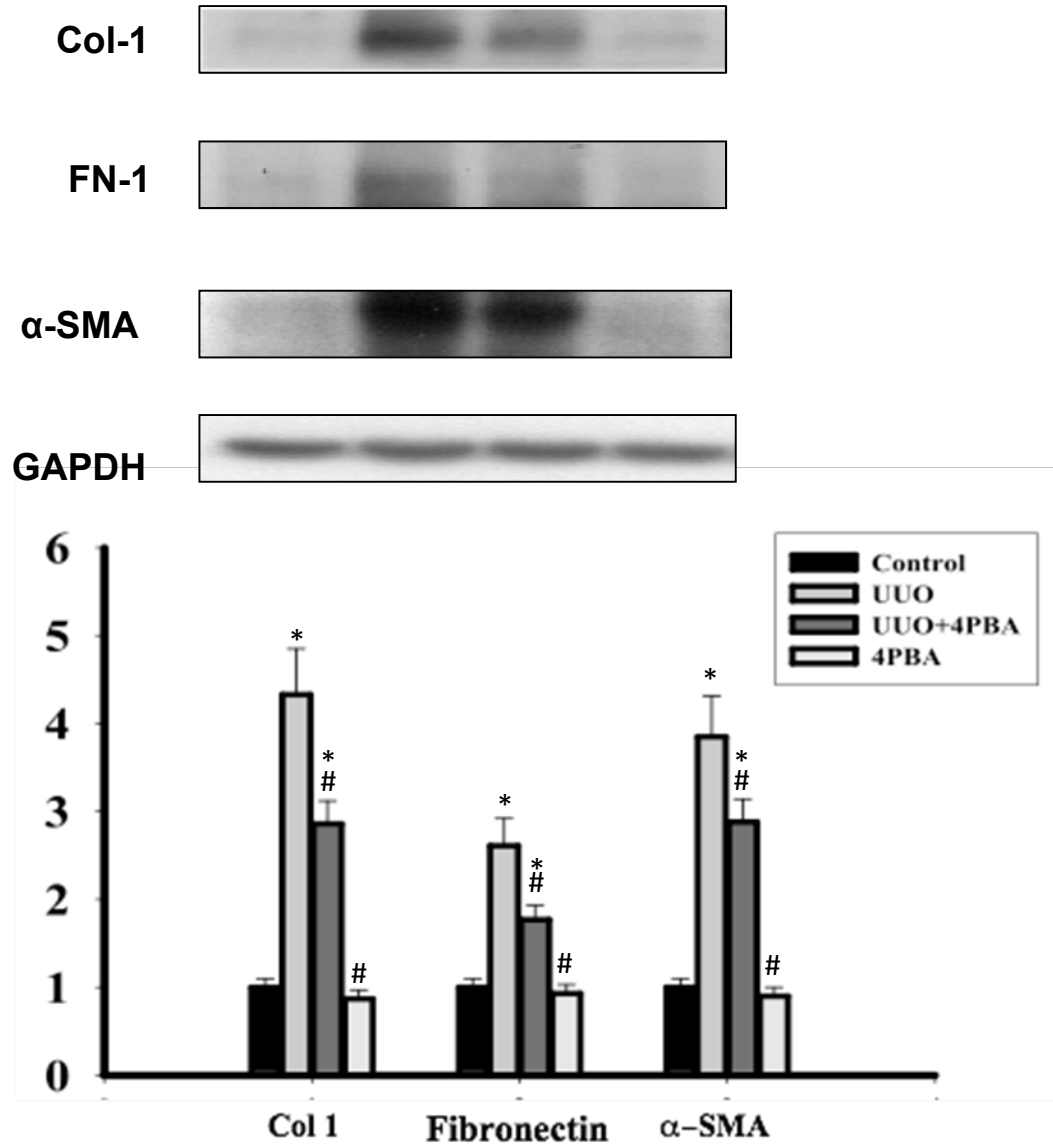

Figure 1S

Supplement: 11_131_Chiang_Suppl.pdf [file 11_131_Chiang_Suppl.pdf]
